# Supplementary material
Source: PubMed Central journal article supplement (PMC7216460)
Supplement: ONCO-25-422-s001.pdf [file ONCO-25-422-s001.pdf]

Supplemental Tables for:

Real-World Assessment of Clinical Outcomes among First-Line Sunitinib Patients with Clear Cell Metastatic Renal Cell Carcinoma (mRCC) by the International mRCC Database Consortium (IMDC) Risk Group

Daniel Heng et al.

**Table S1.** Reasons for Treatment Discontinuation among Patients with Clear Cell mRCC who Received First-Line Sunitinib Since 2010, Stratified by IMDC Prognostic Risk Groups<sup>1</sup>

|                                              | Overall    | IMDC Prognostic Risk Group |               |               |
|----------------------------------------------|------------|----------------------------|---------------|---------------|
|                                              |            | Favorable                  | Intermediate  | Poor          |
|                                              | N=1,521    | N=248 (16.3%)              | N=890 (58.5%) | N=383 (25.2%) |
| Reasons for treatment discontinuation, n (%) | 899        | 157                        | 536           | 206           |
| Disease progression                          | 529 (58.8) | 91 (58.0)                  | 316 (59.0)    | 122 (59.2)    |
| Toxicity                                     | 235 (26.1) | 52 (33.1)                  | 141 (26.3)    | 42 (20.4)     |
| Other <sup>2</sup>                           | 87 (9.7)   | 11 (7.0)                   | 54 (10.1)     | 22 (10.7)     |
| Death                                        | 32 (3.6)   | 2 (1.3)                    | 17 (3.2)      | 13 (6.3)      |
| Disease progression & toxicity               | 16 (1.8)   | 1 (0.6)                    | 8 (1.5)       | 7 (3.4)       |

mRCC: metastatic renal cell cancer; IMDC: International Metastatic Renal Cell Carcinoma Database Consortium.

<sup>1</sup>Only patients who discontinued first-line treatment were included.

<sup>2</sup>Other reasons included patient refusal, lack of clinical benefit, loss to follow up, surgery, and transfer of care to other centers.

Supplemental Tables for:

Real-World Assessment of Clinical Outcomes among First-Line Sunitinib Patients with Clear Cell Metastatic Renal Cell Carcinoma (mRCC) by the International mRCC Database Consortium (IMDC) Risk Group

Daniel Heng et al.

**Table S2.** Second-line Treatment among Patients with Clear Cell mRCC who Received First-Line Sunitinib since 2010, Stratified by IMDC Prognostic Risk Groups

|                             | Overall<br>N=915 | IMDC Prognostic Risk Group |                               |                       |
|-----------------------------|------------------|----------------------------|-------------------------------|-----------------------|
|                             |                  | Favorable<br>N=183 (20.0%) | Intermediate<br>N=570 (62.3%) | Poor<br>N=162 (17.7%) |
| Everolimus                  | 362 (39.6)       | 61 (33.3)                  | 230 (40.4)                    | 71 (43.8)             |
| Pazopanib                   | 140 (15.3)       | 28 (15.3)                  | 89 (15.6)                     | 23 (14.2)             |
| Axitinib                    | 133 (14.5)       | 27 (14.8)                  | 74 (13.0)                     | 32 (19.8)             |
| Nivolumab                   | 102 (11.1)       | 28 (15.3)                  | 66 (11.6)                     | 8 (4.9)               |
| Sorafenib                   | 64 (7.0)         | 15 (8.2)                   | 40 (7.0)                      | 9 (5.6)               |
| Sunitinib                   | 49 (5.4)         | 11 (6.0)                   | 28 (4.9)                      | 10 (6.2)              |
| Investigational drug        | 26 (2.8)         | 4 (2.2)                    | 20 (3.5)                      | 2 (1.2)               |
| Temsirolimus                | 12 (1.3)         | 1 (0.5)                    | 7 (1.2)                       | 4 (2.5)               |
| Cabozantinib                | 11 (1.2)         | 3 (1.6)                    | 7 (1.2)                       | 1 (0.6)               |
| Interferon or interleukin-2 | 4 (0.4)          | 1 (0.5)                    | 3 (0.5)                       | 0 (0.0)               |
| Bevacizumab                 | 8 (0.9)          | 1 (0.5)                    | 5 (0.9)                       | 2 (1.2)               |
| Other <sup>1</sup>          | 4 (0.4)          | 3 (1.6)                    | 1 (0.2)                       | 0 (0.0)               |

mRCC: metastatic renal cell cancer; IMDC: International Metastatic Renal Cell Carcinoma Database Consortium

Notes:

<sup>1</sup>Other includes combination therapies.

Supplemental Tables for:

Real-World Assessment of Clinical Outcomes among First-Line Sunitinib Patients with Clear Cell Metastatic Renal Cell Carcinoma (mRCC) by the International mRCC Database Consortium (IMDC) Risk Group

Daniel Heng et al.

**Table S3.** Clinical Outcomes among Patients with Clear Cell mRCC who Received First-Line Sunitinib Since 2010 with Intermediate IMDC Prognostic Risk

|                                                                        | Number of Patients | Median OS (95% CI),<br>months | Median TTD (95%CI),<br>months |
|------------------------------------------------------------------------|--------------------|-------------------------------|-------------------------------|
| Intermediate with 2 risk factors                                       | 427                | 21.9 (18.5, 25.8)             | 6.6 (5.6, 7.9)                |
| Intermediate with 1 risk factor                                        | 458                | 35.1 (31.7, 39.6)             | 10.3 (8.7, 12.0)              |
| Calcium > ULN                                                          | 21                 | 38.1 (25.8, NR)               | 22.6 (9.8, 28.3)              |
| Less than 1 year from time of diagnosis to targeted therapy initiation | 225                | 35.6 (31.9, 42.6)             | 9.2 (8.3, 11.3)               |
| KPS < 80%                                                              | 27                 | 32.4 (12.0, NR)               | 13.0 (4.8, 21.5)              |
| Neutrophil > ULN                                                       | 35                 | 32.3 (17.9, 59.4)             | 7.5 (3.1, 12.9)               |
| Hemoglobin < LLN                                                       | 140                | 31.9 (24.9, 44.8)             | 10.4 (7.9, 13.2)              |
| Platelet > ULN                                                         | 10                 | NR                            | 17.4 (8.3, 27.0)              |

mRCC: metastatic renal cell cancer; IMDC: International Metastatic Renal Cell Carcinoma Database Consortium; OS: overall survival; TTD: time to treatment discontinuation; CI: confidence interval; NR: not reached; KPS: Karnofsky Performance Status; LLN: lower limit of normal; ULN: upper limit of normal
